# Supplementary material for: Optimizing isothiocyanate formation during enzymatic glucosinolate breakdown by adjusting pH value, temperature and dilution in Brassica vegetables and Arabidopsis thaliana
Source: PubMed Central journal article supplement (PMC5240131; doi:10.1038/srep40807), 2017-01-17

Optimizing isothiocyanate formation during enzymatic glucosinolate breakdown by adjusting pH value, temperature and dilution in *Brassica* vegetables and *Arabidopsis thaliana*

Franziska S. Hanschen<sup>1\*</sup>, Rebecca Klopsch<sup>1</sup>, Teresa Oliviero<sup>2</sup>, Monika Schreiner<sup>1</sup>, Ruud Verkerk<sup>2</sup> and Matthijs Dekker<sup>2</sup>

<sup>1</sup>Department of Plant Quality, Leibniz Institute of Vegetable and Ornamental Crops, Theodor-Echtermeyer-Weg 1, 14979 Grossbeeren, Germany

<sup>2</sup>Food Quality and Design Group, Wageningen University, PO Box 17, 6700 AA Wageningen, The Netherlands

\*Corresponding author:

Franziska S. Hanschen

Leibniz Institute of Vegetable and Ornamental Crops, Theodor-Echtermeyer-Weg 1, 14979 Grossbeeren, Germany

Tel: 0049-33701-78241

Fax: 0049-33701-55391

Email: hanschen@igzev.de

| Glucosinolates (GLS) in<br>µmol/g fresh weight | <i>Brassica rapa</i> 215 |       | Inactivated <i>Brassica rapa</i><br>215 |       | <i>Brassica rapa</i> 374 |       | Inactivated <i>Brassica rapa</i><br>374 |       | <i>Arabidopsis thaliana</i> Bur-0 |       | <i>Arabidopsis thaliana</i> HI-0 |       | <i>Brassica oleracea</i><br>BroccoCress® |       | Inactivated <i>Brassica</i><br><i>oleracea</i> BroccoCress® |       | <i>Brassica oleracea</i> white<br>cabbage |       | Inactivated <i>Brassica</i><br><i>oleracea</i> white<br>cabbage |       |
|------------------------------------------------|--------------------------|-------|-----------------------------------------|-------|--------------------------|-------|-----------------------------------------|-------|-----------------------------------|-------|----------------------------------|-------|------------------------------------------|-------|-------------------------------------------------------------|-------|-------------------------------------------|-------|-----------------------------------------------------------------|-------|
|                                                | MW                       | SD    | MW                                      | SD    | MW                       | SD    | MW                                      | SD    | MW                                | SD    | MW                               | SD    | MW                                       | SD    | MW                                                          | SD    | MW                                        | SD    | MW                                                              | SD    |
| 2-propenyl (2Prop)                             | 0.000                    | 0.000 | 0.000                                   | 0.000 | 0.000                    | 0.000 | 0.000                                   | 0.000 | 1.806                             | 0.019 | 5.088                            | 0.003 | 0.000                                    | 0.000 | 0.000                                                       | 0.000 | 1.231                                     | 0.018 | 2.357                                                           | 0.086 |
| 3-butenyl (3But)                               | 0.296                    | 0.003 | 0.102                                   | 0.001 | 1.126                    | 0.034 | 0.676                                   | 0.024 | 2.910                             | 0.011 | 0.036                            | 0.000 | 0.020                                    | 0.000 | 0.003                                                       | 0.001 | 0.033                                     | 0.003 | 0.048                                                           | 0.001 |
| 4-pentenyl                                     | 0.194                    | 0.006 | 0.025                                   | 0.000 | 0.391                    | 0.012 | 0.074                                   | 0.003 | 0.073                             | 0.005 | 0.000                            | 0.000 | 0.000                                    | 0.000 | 0.000                                                       | 0.000 | 0.000                                     | 0.000 | 0.000                                                           | 0.000 |
| R-2-OH-3-butenyl                               | 0.053                    | 0.001 | 0.030                                   | 0.002 | 0.000                    | 0.000 | 0.000                                   | 0.000 | 0.198                             | 0.005 | 0.000                            | 0.000 | 0.011                                    | 0.001 | 0.000                                                       | 0.000 | 0.428                                     | 0.025 | 0.701                                                           | 0.027 |
| S-2-OH-3-butenyl                               | 0.000                    | 0.000 | 0.000                                   | 0.000 | 0.000                    | 0.000 | 0.000                                   | 0.000 | 0.355                             | 0.001 | 0.000                            | 0.000 | 0.000                                    | 0.000 | 0.000                                                       | 0.000 | 0.000                                     | 0.000 | 0.000                                                           | 0.000 |
| 3-(methylthio)propyl                           | 0.000                    | 0.000 | 0.000                                   | 0.000 | 0.000                    | 0.000 | 0.000                                   | 0.000 | 0.046                             | 0.001 | 0.000                            | 0.000 | 0.007                                    | 0.001 | 0.000                                                       | 0.000 | 0.024                                     | 0.001 | 0.098                                                           | 0.015 |
| 4-(methylthio)butyl                            | 0.000                    | 0.000 | 0.000                                   | 0.000 | 0.000                    | 0.000 | 0.000                                   | 0.000 | 0.000                             | 0.000 | 0.000                            | 0.000 | 1.119                                    | 0.045 | 1.114                                                       | 0.001 | 0.014                                     | 0.002 | 0.023                                                           | 0.001 |
| 3-(methylsulphinyl)propyl                      | 0.000                    | 0.000 | 0.000                                   | 0.000 | 0.000                    | 0.000 | 0.000                                   | 0.000 | 0.000                             | 0.000 | 0.000                            | 0.000 | 0.163                                    | 0.001 | 0.151                                                       | 0.002 | 0.587                                     | 0.012 | 1.467                                                           | 0.065 |
| 4-(methylsulphinyl)butyl                       | 0.066                    | 0.025 | 0.024                                   | 0.011 | 0.010                    | 0.002 | 0.033                                   | 0.010 | 0.038                             | 0.014 | 0.000                            | 0.000 | 5.856                                    | 0.078 | 5.923                                                       | 0.134 | 0.240                                     | 0.011 | 0.486                                                           | 0.021 |
| 7-(methylsulphinyl)heptyl                      | 0.000                    | 0.000 | 0.000                                   | 0.000 | 0.000                    | 0.000 | 0.000                                   | 0.000 | 0.196                             | 0.001 | 0.034                            | 0.000 | 0.000                                    | 0.000 | 0.000                                                       | 0.000 | 0.000                                     | 0.000 | 0.000                                                           | 0.000 |
| 8-(methylsulphinyl)octyl                       | 0.000                    | 0.000 | 0.000                                   | 0.000 | 0.000                    | 0.000 | 0.000                                   | 0.000 | 0.925                             | 0.017 | 0.477                            | 0.014 | 0.000                                    | 0.000 | 0.000                                                       | 0.000 | 0.000                                     | 0.000 | 0.000                                                           | 0.000 |
| 2-phenylethyl                                  | 0.012                    | 0.002 | 0.004                                   | 0.000 | 0.031                    | 0.002 | 0.011                                   | 0.000 | 0.017                             | 0.004 | 0.000                            | 0.004 | 0.019                                    | 0.000 | 0.012                                                       | 0.000 | 0.000                                     | 0.000 | 0.001                                                           | 0.000 |
| 3-indolylmethyl                                | 0.080                    | 0.002 | 0.034                                   | 0.001 | 0.023                    | 0.002 | 0.011                                   | 0.001 | 0.252                             | 0.004 | 0.164                            | 0.004 | 0.186                                    | 0.005 | 0.165                                                       | 0.001 | 0.093                                     | 0.004 | 0.154                                                           | 0.005 |
| 1-methoxy-3-indolylmethyl                      | 0.005                    | 0.002 | 0.003                                   | 0.000 | 0.028                    | 0.002 | 0.010                                   | 0.001 | 0.044                             | 0.000 | 0.042                            | 0.001 | 0.047                                    | 0.001 | 0.052                                                       | 0.003 | 0.016                                     | 0.000 | 0.023                                                           | 0.001 |
| 4-hydroxy-3-indolylmethyl                      | 0.006                    | 0.000 | 0.003                                   | 0.001 | 0.004                    | 0.001 | 0.003                                   | 0.000 | 0.007                             | 0.001 | 0.005                            | 0.001 | 0.147                                    | 0.001 | 0.121                                                       | 0.001 | 0.112                                     | 0.008 | 0.194                                                           | 0.013 |
| 4-methoxy-3-indolylmethyl                      | 0.021                    | 0.001 | 0.015                                   | 0.000 | 0.014                    | 0.000 | 0.006                                   | 0.000 | 0.065                             | 0.004 | 0.026                            | 0.000 | 0.113                                    | 0.003 | 0.102                                                       | 0.001 | 0.012                                     | 0.001 | 0.007                                                           | 0.000 |
| Total GLS                                      | 0.666                    | 0.011 | 0.240                                   | 0.011 | 1.627                    | 0.054 | 0.824                                   | 0.015 | 6.933                             | 0.041 | 5.872                            | 0.007 | 7.687                                    | 0.020 | 7.643                                                       | 0.135 | 2.790                                     | 0.024 | 5.559                                                           | 0.235 |



Influence of temperature at pH 4.2 on GLS-degradation in Bur-0

| pH 4.2 | % of 2-propenyl glucosinolate breakdowns |               |                | % of 3-butenyl glucosinolate breakdowns |                |                |
|--------|------------------------------------------|---------------|----------------|-----------------------------------------|----------------|----------------|
|        | T                                        | 2-propenyl CN | 2-propenyl ITC | 1-cyano-2,3-epithiopropene              | 3-butenyl CN   | 3-butenyl ITC  |
| 4      | 2.99 ± 0.60 a                            | 3.96 ± 0.81 a | 93.05 ± 1.09 b | 2.62 ± 1.32 a                           | 9.28 ± 2.12 a  | 88.10 ± 2.36 b |
| 22     | 4.20 ± 1.45 a                            | 4.35 ± 0.39 a | 91.45 ± 1.66 b | 2.42 ± 0.95 a                           | 8.74 ± 0.66 a  | 88.84 ± 1.15 b |
| 37     | 14.42 ± 4.60 b                           | 9.81 ± 1.47 b | 75.77 ± 6.03 a | 8.56 ± 2.48 b                           | 16.21 ± 3.44 b | 75.23 ± 5.89 a |



Glucosinolate hydrolysis products in myrosinase inactivated plant material ( $\mu\text{mol/g FW}$ )

*Brassica rapa* 215

3-butenyl ITC 0.0083  $\pm$  0.0081

*Brassica rapa* 374

3-butenyl ITC 0.0024  $\pm$  0.0007

*Brassica oleracea* BroccoCress<sup>®</sup>

4-(methylthio)butyl CN 0.0771  $\pm$  0.0135

4-(methylthio)butyl ITC 0.0048  $\pm$  0.0012

4-(methylsulfinyl)butyl CN 0.1747  $\pm$  0.0150

2-phenylethyl CN 0.0095  $\pm$  0.0004

indole-3-acetonitrile 0.0095  $\pm$  0.0019

4-methoxyindole-3-acetonitrile 0.0054  $\pm$  0.0013

*Brassica oleracea* white cabbage sprouts

2-propenyl CN 0.0128  $\pm$  0.0014

2-propenyl ITC 0.0014  $\pm$  0.0024

2-hydroxy-3-butenyl CN 0.0436  $\pm$  0.0012

3-(methylthio)propyl CN 0.0065  $\pm$  0.0001

4-(methylthio)butyl CN 0.0022  $\pm$  0.0001

4-(methylthio)butyl ITC 0.0004  $\pm$  0.0007

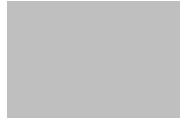

Supplement: srep40807-s1.pdf [file srep40807-s1.pdf]
